# Supplementary material for: Warum prokrastinieren Promovierende?
Source: Atypon-hosted journal article supplement (doi:10.1026/0012-1924/a000325), 2023-11-07
Supplement: 0012-1924_a000325_esm1.pdf [file 0012-1924_a000325_esm1.pdf]

**Elektronisches Supplement 1.** Tabelle zur Modellgüte sowie Tabelle der konvergenten Validität ausgewählter Gründeskalen.

**Tabelle A.** Modellgüte

| Modell         | SRMR | RMSEA | 90 %<br>RMSEA | CFI  | TLI  | AIC       |
|----------------|------|-------|---------------|------|------|-----------|
| <b>FGAP:</b>   |      |       |               |      |      |           |
| 13 Faktoren    | .012 | .037  | [.031, .043]  | .982 | .958 | 46026.077 |
| <b>FGAP-P:</b> |      |       |               |      |      |           |
| 15 Faktoren    | .013 | .041  | [.036, .046]  | .973 | .939 | 55872.341 |
| 2 Fak. h. Ord. | .063 | .057  | [.053, .061]  | .937 | .881 | 56275.650 |
| 5 Fak. h. Ord. | .058 | .051  | [.048, .056]  | .951 | .906 | 56099.952 |

*Anmerkungen.* SRMR = Standardized Root Mean Square Residual; RMSEA = Root Mean Square Error of Approximation; 90 % RMSEA = 90 %-Konfidenzintervall des RMSEA; CFI = Comparative Fit Index; TLI = Tucker Lewis Index, AIC = Akaike Information Criterion; Fak. h. Ord. = Faktoren höherer Ordnung; FGAP = Fragebogen zu den Gründen akademischer Prokrastination; FGAP-P = Fragebogen zu den Gründen akademischer Prokrastination für Promovierende.

**Tabelle B.** Konvergente Validität ausgewählter Gründeskalen

| Gründeskala                        | Selbstwertge-<br>fühl | Aufmerksam-<br>keit | Abbruchs-<br>in-<br>tention | Sorge über<br>Fehler und<br>Zweifel | Persönliche<br>Ansprüche |
|------------------------------------|-----------------------|---------------------|-----------------------------|-------------------------------------|--------------------------|
| Mangelndes Selbst-<br>vertrauen    | -.64**                | .46**               | .38**                       | .60**                               | -.01                     |
| Mangelndes Durch-<br>haltevermögen | -.27**                | .73**               | .22**                       | .25**                               | -.25**                   |
| Unsicherheit bzgl.<br>Promotion    | -.32**                | .27**               | .76**                       | .23**                               | -.15**                   |
| Angst                              | -.45**                | .38**               | .25**                       | .55**                               | .12*                     |
| Perfektionismus                    | -.28**                | .20**               | -.01                        | .45**                               | .35**                    |

*Anmerkungen.* \* =  $p < .05$  (2-seitig); \*\* =  $p < .01$  (2-seitig).
