# Supplementary material for: Warum prokrastinieren Promovierende?
Source: Atypon-hosted journal article supplement (doi:10.1026/0012-1924/a000325), 2023-11-07
Supplement: 0012-1924_a000325_esm2.pdf [file 0012-1924_a000325_esm2.pdf]

## **Elektronisches Supplement 2.** Fragebogen zu den Gründen akademischer Prokrastination.

### **Fragebogen zu den Gründen akademischer Prokrastination für Promovierende (FGAP-P)**

Im Folgenden geht es um die Gründe für Ihr Aufschieben in der Promotion. Bitte geben Sie an, inwieweit die nachstehenden Gründe auf Ihr Aufschieben in der Promotion zutreffen.

Ich schiebe auf...

#### Mangelndes Zeitmanagement

weil ich bei der Planung der Aufgabenbearbeitung die zur Verfügung stehende Zeit überschätze

weil ich bei meiner Planung die Zeit für die Aufgabenbearbeitung unterschätze

weil ich mir bei der Planung der Aufgabenbearbeitung unrealistische Ziele setze

#### Mangelnde Selbstmotivation

weil ich mich nicht motivieren kann, mit der Bearbeitung meiner Aufgaben zu beginnen

weil ich mich nicht motivieren kann, meine Aufgaben zu Ende zu bringen

weil ich mich nicht motivieren kann, die Aufgabenbearbeitung fortzusetzen

#### Mangelndes Durchhaltevermögen

weil es mir schwer fällt, an meinen Aufgaben ausdauernd zu arbeiten

weil es mir schwer fällt, über einen längeren Zeitraum bei der Aufgabenbearbeitung dabei zu bleiben

weil es mir schwer fällt, mich auf meine Aufgaben zu konzentrieren

#### Mangelnde Forschungskompetenz

weil ich nicht weiß, wie ich mit der Bearbeitung meiner Aufgaben anfangen soll

weil ich nicht weiß, wie ich bei inhaltlichen Schwierigkeiten meine Aufgaben bearbeiten soll

weil ich nicht weiß, wie ich wichtige Inhalte für die Bearbeitung meiner Aufgaben auswählen soll

#### Mangelndes Selbstvertrauen

weil ich eine schlechte Meinung von mir selbst habe

weil ich wenig Selbstvertrauen habe

weil ich an meinen Fähigkeiten zweifle

#### Perfektionismus

weil ich in der Promotion besonders gut sein möchte

weil ich eine besonders gute Benotung haben möchte

weil ich in der Promotion Andere mit besonders guten Leistungen beeindrucken möchte

weil ich mir sehr hohe Ziele setze

Angst

weil ich Angst habe, mich vor Anderen zu blamieren.

weil ich Angst habe, meine Aufgaben in der Promotion nicht bewältigen zu können

weil ich Angst habe, meine Aufgaben in der Promotion schlecht zu machen

weil ich Angst habe, eine negative Rückmeldung von meinem Betreuer zu erhalten

Arousal Prokrastination

weil ich erst unter Druck mein Bestes in der Promotion geben kann

weil ich unter Druck in der Promotion am besten arbeiten kann

weil ich unter Druck in der Promotion besser Leistungen erbringe

Unsicherheit bzgl. Promotion

weil ich mir unsicher bin, ob ich meine Promotion fortführen möchte

weil ich unsicher bin, ob meine Entscheidungen in der Promotion die richtigen sind

weil ich nicht weiß, ob meine Promotionsausrichtung meine derzeitigen Interessen entspricht

Frühere Erfolge trotz Aufschieben

weil mein Aufschieben in der Vergangenheit keine negativen Konsequenzen für mich hatte.

weil ich meine Aufgaben in der Vergangenheit trotz meines Aufschiebens noch rechtzeitig fertigbekommen habe.

weil ich in der Vergangenheit trotz meines Aufschiebens erfolgreich war.

Aversive Aufgabe

weil ich meine Aufgaben sinnlos finde.

weil ich meine Aufgaben langweilig finde.

weil mir meine Aufgaben keinen Spaß machen.

Aufwändige Aufgabe

weil meine Aufgaben für mich umfangreich sind.

weil meine Aufgaben für mich anstrengend sind.

weil meine Aufgaben für mich aufwändig sind.

Andere Aufgaben

weil andere Aufgaben in diesem Moment zeitlich dringender erscheinen, obwohl sie es nicht sind

weil andere Aufgaben in diesem Moment wichtiger erscheinen, obwohl sie es nicht sind

weil ich meine Aufgaben falsch priorisiere

Ungünstiges Betreuer innenverhalten

weil mein Betreuer bei Fragen nicht genügend Zeit für mich hat

weil mein Betreuer bei Fragen schlecht erreichbar ist

weil mein Betreuer mich bei der Bearbeitung meiner Aufgaben nicht unterstützt

Feedback und Deadlines

weil keine Deadlines für Zwischenziele vorhanden sind

weil ich kein direktes Feedback erwarte

weil keine externe Kontrolle gegeben ist

**Antwortformat:**

trifft überhaupt nicht zu, trifft überwiegend nicht zu, trifft eher nicht zu, trifft eher zu, trifft überwiegend zu und trifft voll und ganz zu

for review only/nur zur Begutachtung
