# Supplementary material for: Warum prokrastinieren Promovierende?
Source: Atypon-hosted journal article supplement (doi:10.1026/0012-1924/a000325), 2023-11-07
Supplement: 0012-1924_a000325_esm3.pdf [file 0012-1924_a000325_esm3.pdf]

### **Elektronisches Supplement 3.** Multiple Regressionen zur exemplarischen regressiven Betrachtung der Kovariaten auf zwei Sekundärfaktoren (studienbezogene Kompetenzen und Personenvariablen).

Zwei schrittweise multiple lineare Regressionen wurden durchgeführt, um die Vorhersagekraft der Kovariaten (Selbstwertgefühl, Aufmerksamkeit, Abbruchsintention, Sorge über Fehler und Zweifel, Persönliche Ansprüche) auf die zwei Sekundärfaktoren studienbezogene Kompetenzen und Personenvariablen zu bestimmen. Die Kovariaten beziehen sich direkt auf die Primärfaktoren *Mangelndes Selbstvertrauen*, *Mangelndes Durchhaltevermögen*, *Unsicherheit bzgl. der Promotion*, *Angst* und *Perfektionismus*, die wiederum ausschließlich auf die zwei genannten Sekundärfaktoren laden. Daher wurden exemplarisch nur die Sekundärfaktoren studienbezogene Kompetenzen und Personenvariablen regressiv betrachtet.

Zunächst zeigte die Vorhersage der studienbezogenen Kompetenzen durch die Kovariaten ein signifikantes Ergebnis,  $F(4, 396) = 87.13, p < .001$ , mit allen oben genannten Prädiktoren exklusive dem Selbstwertgefühl. Es zeigt sich eine nach Cohen (1988) hohe aufgeklärte Varianz ( $R^2 = .468$ ), wobei die Kovariate Aufmerksamkeit mit 39 % die höchste Varianzaufklärung leistet.

Zusätzlich wurde eine Analyse der Residualterme vorgenommen, um zu prüfen, ob das Regressionsmodell die Daten angemessen abbildet. Der Shapiro-Wilk-Test ( $p = .60$ ) sowie die graphische Betrachtung eines Histogramms und eines QQ-Plots sprechen für eine Normalverteilung der Residuen. Der Durbin-Watson-Test wurde durchgeführt, um die Autokorrelation in den Residuen zu prüfen. Die Durbin-Watson-Teststatistik betrug 1.92. Dies deutet darauf hin, dass keine Autokorrelation vorliegt. Somit kann von einer Unabhängigkeit der Residuen ausgegangen werden. Abschließend wurde die Annahme der Homoskedastizität in den Residualtermen anhand eines White-Tests geprüft. Da dieser nicht signifikant wurde ( $p = .43$ ), ist von einer Homoskedastizität der Residuen auszugehen. Diese Analysen weisen auf eine Abwesenheit systematischer Muster in den Residualtermen hin und sprechen somit für das erste Regressionsmodell, in dem der Sekundärfaktor studienbezogene Kompetenzen vorhergesagt wurde.

Bei der Vorhersage des Sekundärfaktors Personenvariablen durch die genannten Kovariaten zeigt sich ebenfalls ein signifikantes Regressionsergebnis  $F(4, 396) = 99.33, p < .001$ . Allein

der Prädiktor Persönliche Ansprüche trägt nicht signifikant zur Vorhersage bei und wurde nicht in die Regressionsgleichung aufgenommen. Insgesamt erklären die restlichen vier Kovariaten 50 % der Varianz des Sekundärfaktors Personenvariablen, während die Prädiktoren Sorge über Fehler und Zweifel 36% und Abbruchsintention etwa 9 % der Varianz erklärt. Die Prädiktoren Selbstwertgefühl und Aufmerksamkeit erklären zusammen nur 5 % der Varianz.

Die Analyse der Residualterme zeigte ähnliche Ergebnisse wie zuvor. Der Shapiro-Wilk-Test ( $p = .06$ ) sowie die graphische Betrachtung eines Histogramms sprechen für eine Normalverteilung der Residuen. Im QQ-Plot werden jedoch visuell einige Ausreißer deutlich. Der Durbin-Watson-Test wurde durchgeführt, um die Autokorrelation in den Residuen zu prüfen und deutet auf die Unabhängigkeit der Residuen hin (Durbin-Watson-Teststatistik = 2.17). Der White-Test zur Prüfung der Homoskedastizität der Residualterme wurde nicht signifikant ( $p = .08$ ), sodass Homoskedastizität angenommen wurde. Auf Basis dieser Analysen kann davon ausgegangen werden, dass auch das zweite Regressionsmodell die Daten angemessen abbildet.
